# Supplementary material
Source: Royal Society of Chemistry journal article supplement (doi:10.1039/d6nj01136e)
Supplement: d6nj01136e1.pdf [file d6nj01136e1.pdf]

# Electronic Descriptors and Periodic Trends in Graphene/LDH-Based Nanocarriers for Breast Cancer Drug Delivery

Kaixuan Hu<sup>1,2,#</sup>, Yafei Luo<sup>3,4,#</sup>, Yan Cheng<sup>1,#</sup>, Xinmin Wang<sup>1</sup>, Yuting Song<sup>1</sup>, Chen Fan<sup>3</sup>, Xia Jiang<sup>3</sup>,  
Jianping Hu<sup>2,\*</sup>, Ting Luo<sup>1,\*</sup>

<sup>1</sup> Institute of Breast Health Medicine, West China Hospital, Sichuan University, Chengdu, 610041, China

<sup>2</sup> Key Laboratory of Medicinal and Edible Plants Resources Development of Sichuan Education Department, School of Pharmacy, Chengdu University, Chengdu, 610106, China

<sup>3</sup> Chongqing Key Laboratory of Kinase Modulators as Innovative Medicine, College of Pharmacy (International Academy of Targeted Therapeutics and Innovation), Chongqing University of Arts and Sciences, Chongqing, 402160, China

<sup>4</sup> Key Laboratory of Green Chemistry and Technology, Ministry of Education, College of Chemistry, Sichuan University, Chengdu, Sichuan 610064 P. R. China.

# These authors contributed equally to this work.

\* Correspondence: [hjpcdu@163.com](mailto:hjpcdu@163.com) (J. Hu); [luotingwch@163.com](mailto:luotingwch@163.com)

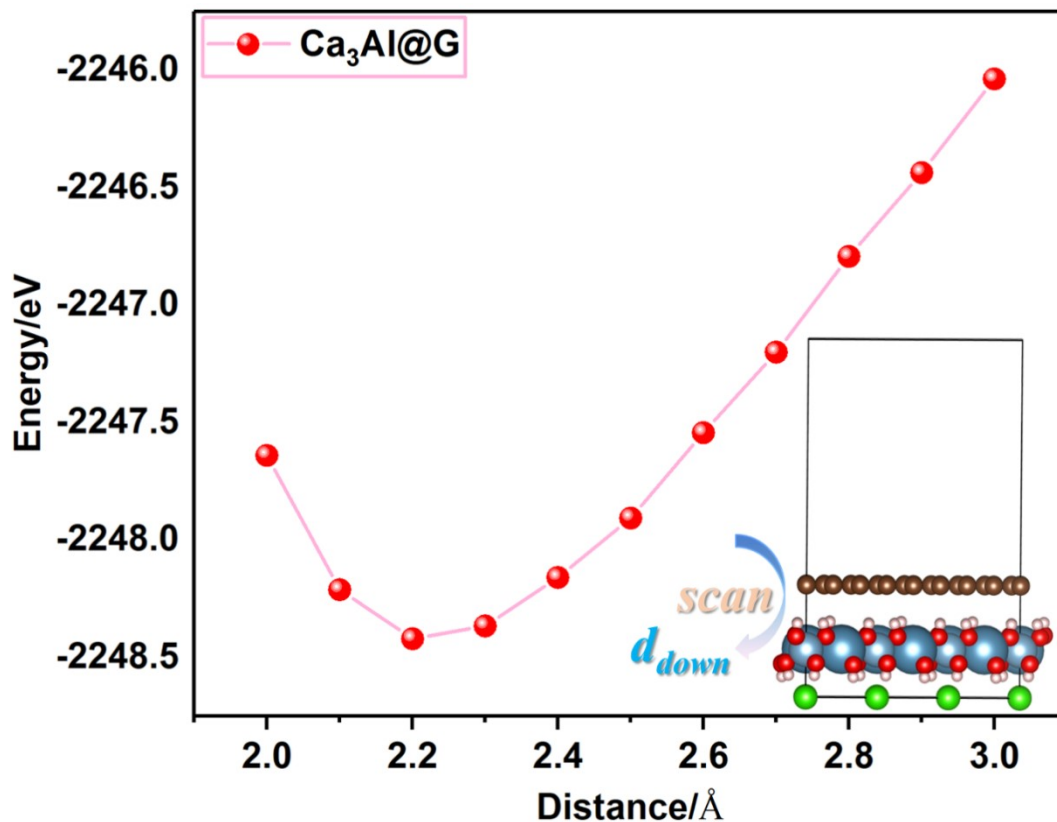

Figure S1. Potential energy surface scans for heterobilayer graphene/ $\text{Ca}_3\text{Al}$ -LDHs systems are performed based on the distance between graphene and  $\text{Ca}_3\text{Al}$ -LDHs.

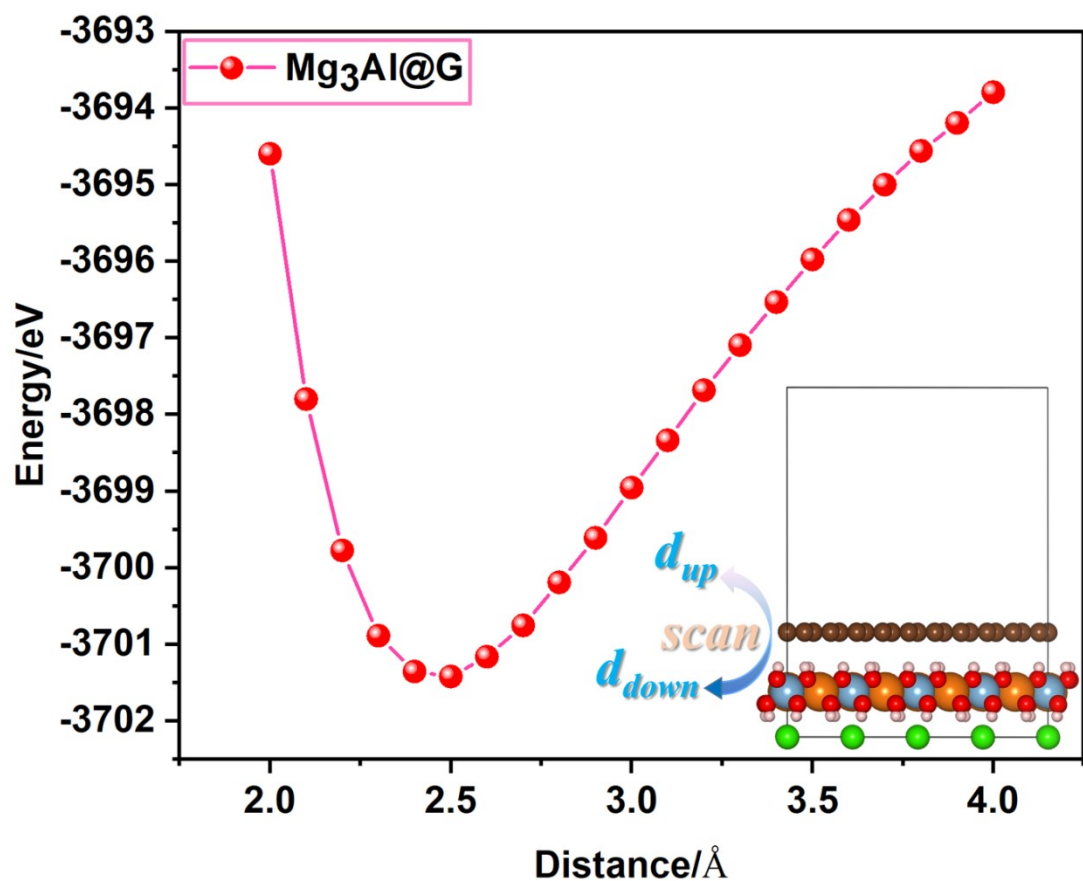

Figure S2. Potential energy surface scans for heterobilayer graphene/ $\text{Mg}_3\text{Al}$ -LDHs systems are performed

based on the distance between graphene and Mg<sub>3</sub>Al-LDHs.

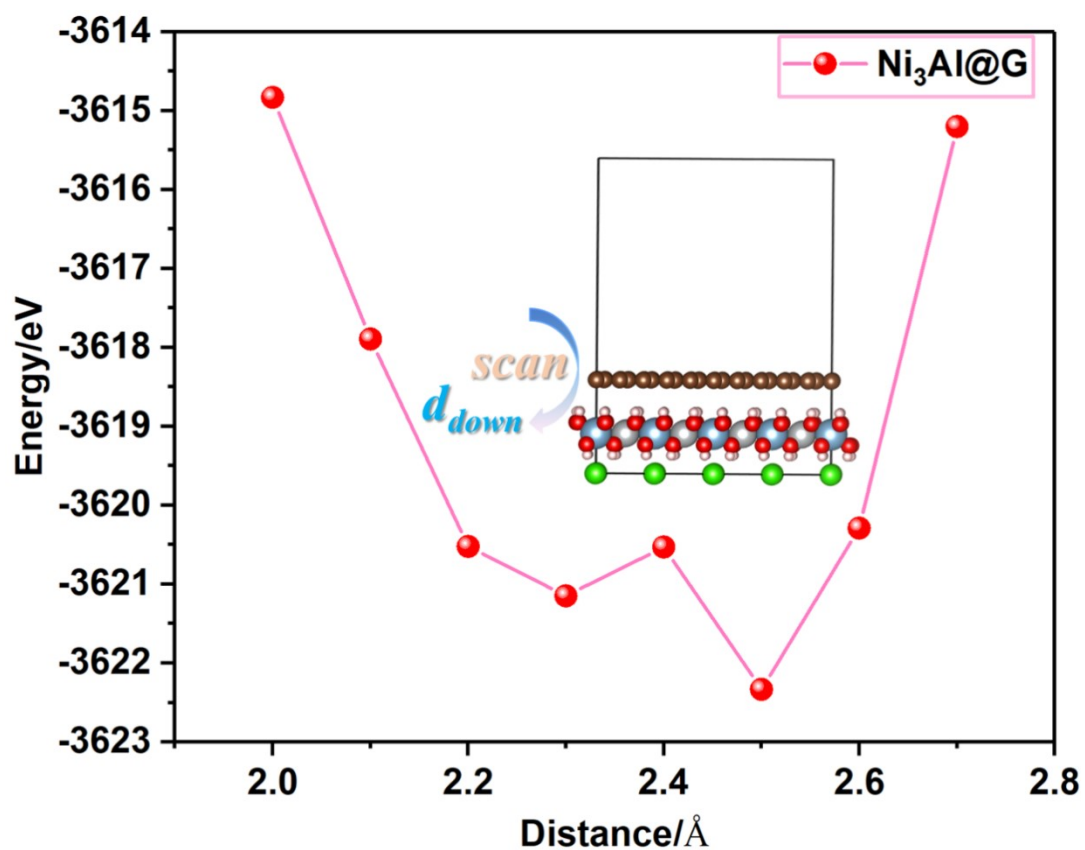

**Figure S3.** Potential energy surface scans for heterobilayer graphene/Ni<sub>3</sub>Al-LDHs systems are performed based on the distance between graphene and Ni<sub>3</sub>Al-LDHs.

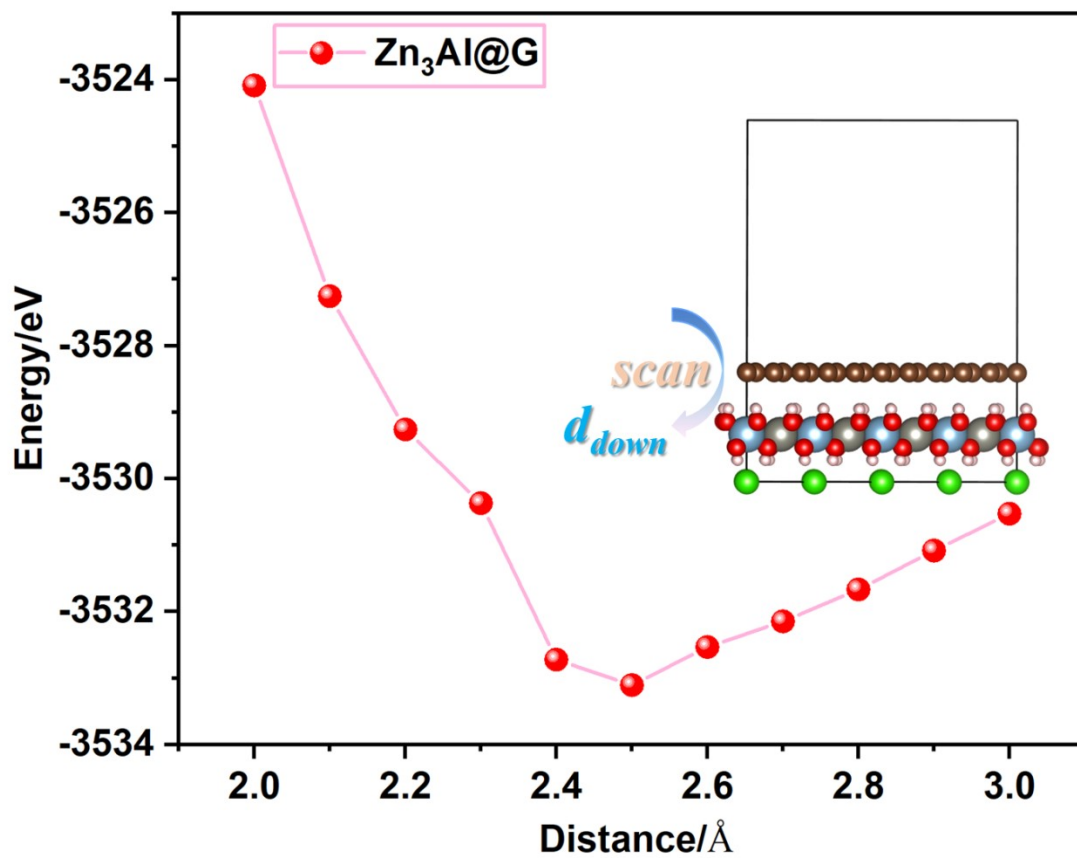

**Figure S4.** Potential energy surface scans for heterobilayer graphene/Zn<sub>3</sub>Al-LDHs systems are performed based on the distance between graphene and Zn<sub>3</sub>Al-LDHs.

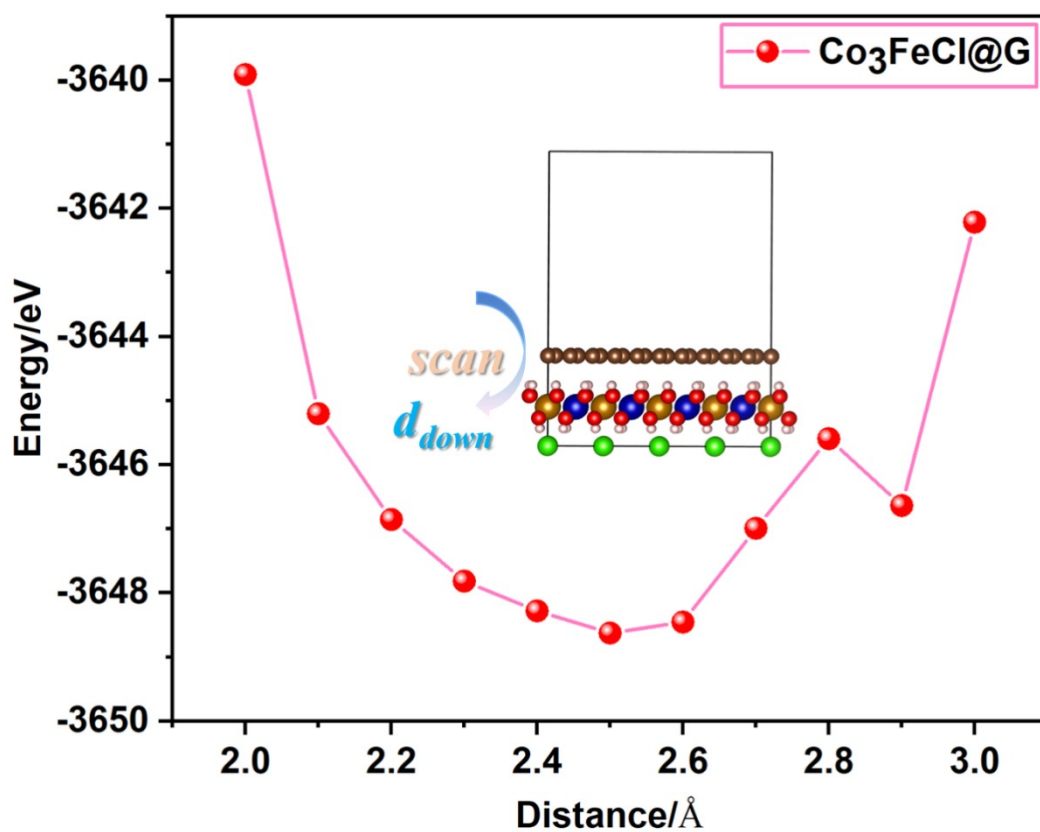

**Figure S5.** Potential energy surface scans for heterobilayer graphene/ $\text{Co}_3\text{Fe-LDH}$ s systems are performed based on the distance between graphene and  $\text{Co}_3\text{Fe-LDH}$ s.

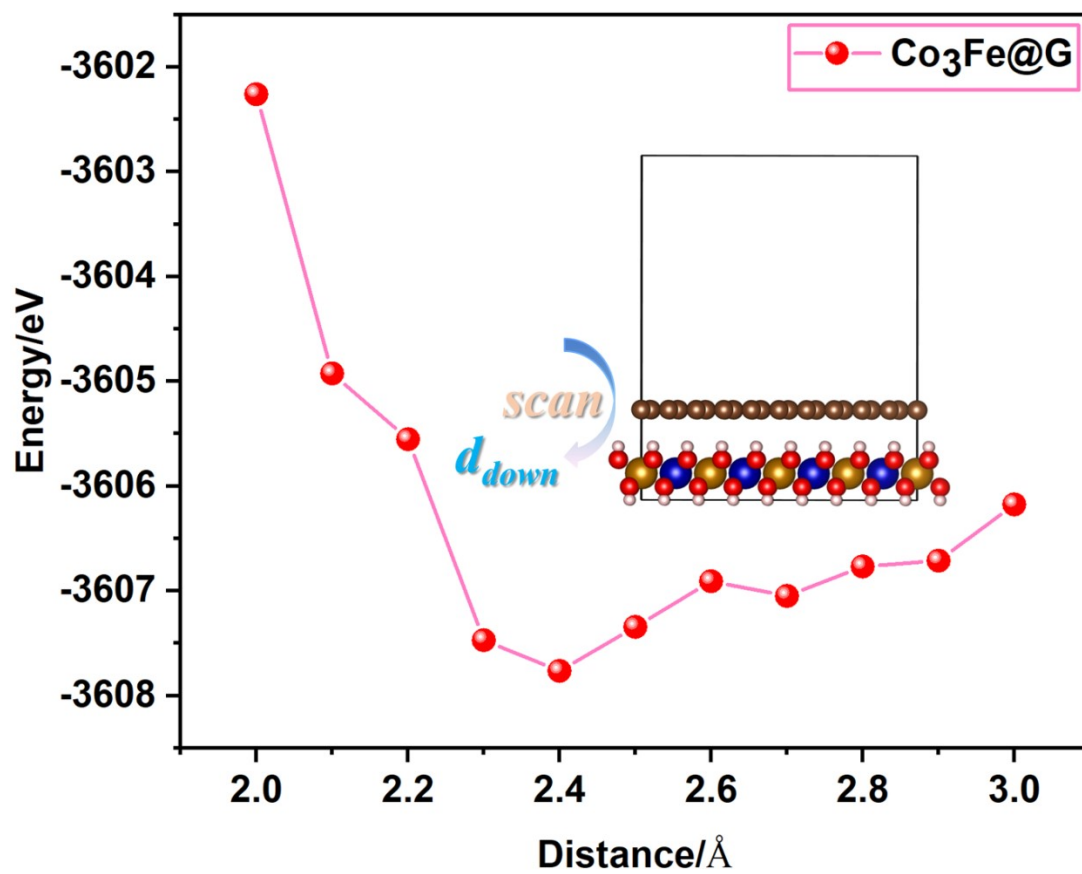

**Figure S6.** Potential energy surface scans for heterobilayer graphene/ $\text{Co}_3\text{Fe}$ -LDHs systems are performed based on the distance between graphene and  $\text{Co}_3\text{Fe}$ -LDHs.

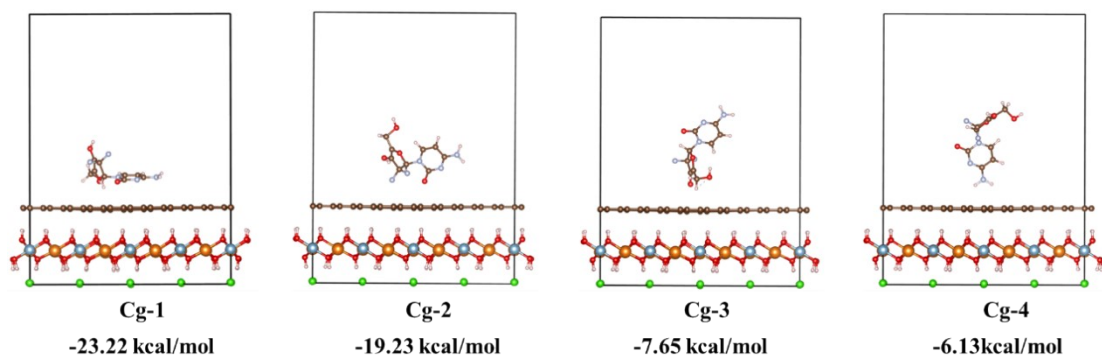

**Figure S7.** Different adsorption configurations for gemcitabine on heterobilayer graphene/Mg<sub>3</sub>Al-LDHs.

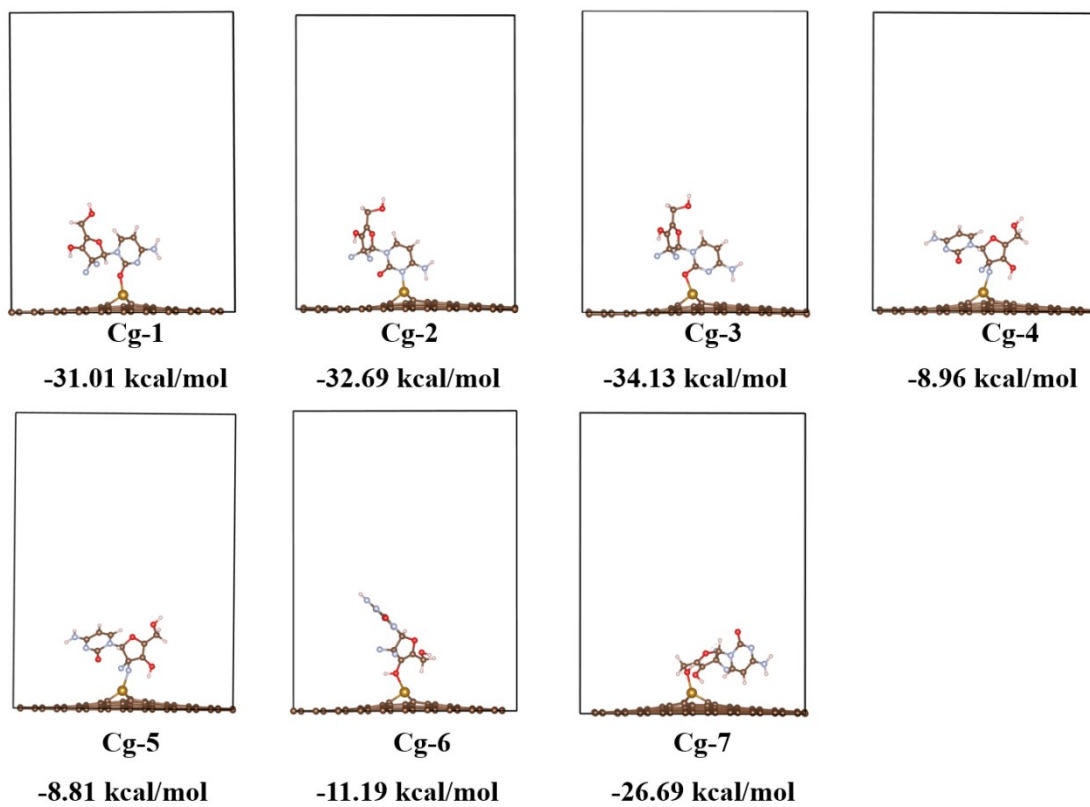

**Figure S8.** Different adsorption configurations for gemcitabine on Fe doped graphene.

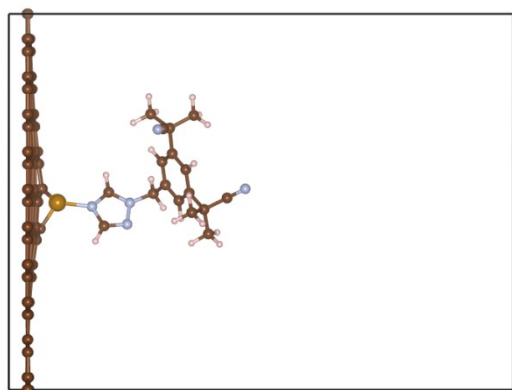

Fe-anastrozole

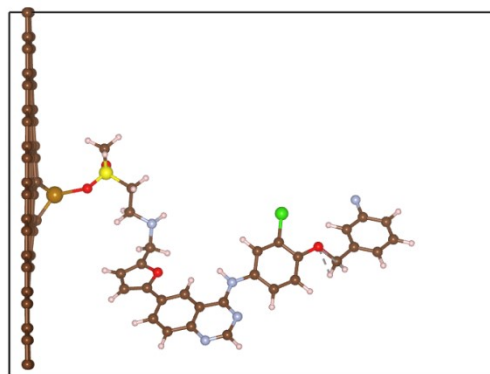

Fe-lapatinib

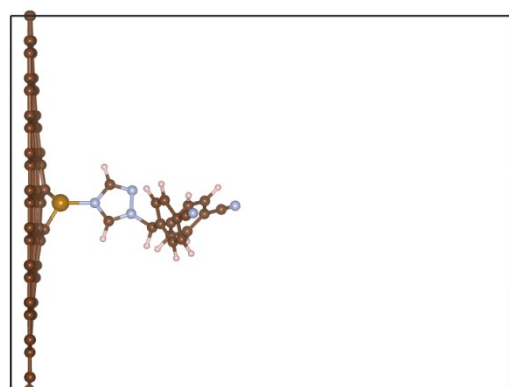

Fe-letrozole

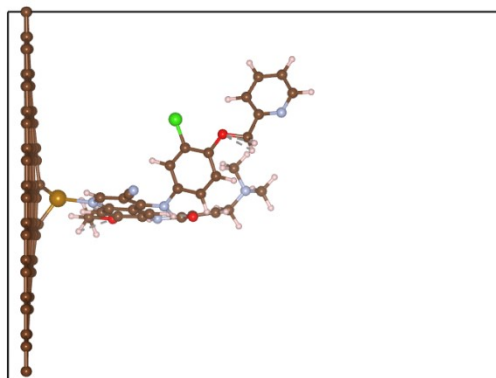

Fe-neratinib

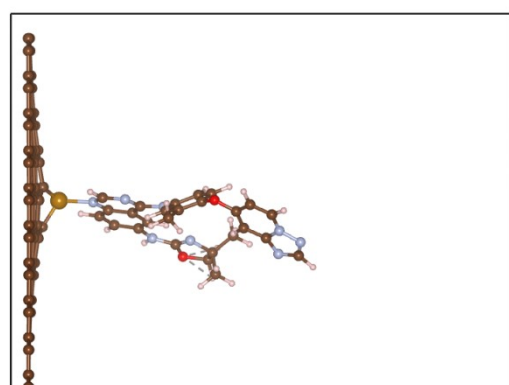

Fe-tucatinib

**Figure S9.** Different adsorption configurations for different potential breast drugs on Fe doped graphene.

**Table S1.** Lattice mismatch and strain values of graphene/M<sub>3</sub>N-LDH heterobilayers.

| <b>System</b>                      | <b><math>L_G</math> Å</b> | <b><math>L_{LDH}</math> Å</b> | <b>Matched <math>L</math> Å</b> | <b>Lattice mismatch %</b> | <b>Graphene strain %</b> | <b>LDH strain %</b> |
|------------------------------------|---------------------------|-------------------------------|---------------------------------|---------------------------|--------------------------|---------------------|
| Graphene/Ca <sub>3</sub> Al-LDH    | 24.60                     | 24.56                         | 24.58                           | 0.16                      | -0.08                    | +0.08               |
| Graphene/Mg <sub>3</sub> Al-LDH    | 24.60                     | 24.40                         | 24.50                           | 0.82                      | -0.41                    | +0.41               |
| Graphene/Ni <sub>3</sub> Al-LDH    | 24.60                     | 24.48                         | 24.54                           | 0.49                      | -0.24                    | +0.25               |
| Graphene/Zn <sub>3</sub> Al-LDH    | 24.60                     | 24.56                         | 24.58                           | 0.16                      | -0.08                    | +0.08               |
| Graphene/Co <sub>3</sub> Fe-LDH-Cl | 24.60                     | 25.04                         | 24.82                           | 1.77                      | +0.89                    | -0.88               |
| Graphene/Co <sub>3</sub> Fe-LDH    | 24.60                     | 24.80                         | 24.70                           | 0.81                      | +0.41                    | -0.40               |

Positive and negative strain values indicate tensile and compressive strain, respectively.
